# Supplementary material for: Aircraft-based observation of volatile organic compounds (VOCs) over the North China Plain
Source: Copernicus journal article supplement (doi:10.5194/egusphere-2025-2988), 2025-07-01
Supplement: Supplementary file 1 [file egusphere-2025-2988-supplement.pdf]

1 *Supporting Information for*

2       **Aircraft-based observation of volatile organic compounds**  
3                   **(VOCs) over the North China Plain**

4   Yibo Huangfu<sup>1,#</sup>, Ziyang Liu<sup>1,#</sup>, Bin Yuan<sup>1,\*</sup>, Sihang Wang<sup>1</sup>, Xianjun He<sup>1</sup>, Wei Zhou<sup>2</sup>,  
5   Fei Wang<sup>2</sup>, Ping Tian<sup>2</sup>, Wei Xiao<sup>2</sup>, Yuanmou Du<sup>2</sup>, Jiujiang Sheng<sup>2,\*</sup>, Min Shao<sup>1</sup>

6   <sup>1</sup> College of Environment and Climate, Institute for Environmental and Climate  
7   Research, Guangdong-Hongkong-Macau Joint Laboratory of Collaborative Innovation  
8   for Environmental Quality, Jinan University, Guangzhou 511443, China

9   <sup>2</sup> Beijing Weather Modification Center, Beijing 100089, China

10   # These authors contributed equally to this work

11   \* Corresponding author: Bin Yuan (byuan@jnu.edu.cn), Jiujiang Sheng  
12   (jiujiangsheng@163.com)

13 **Table S1.** The list of VOC species calibrated with standard gas.

| VOC species   | Ion formula                            |
|---------------|----------------------------------------|
| Methanol      | $\text{CH}_4\text{OH}^+$               |
| Acetonitrile  | $\text{C}_2\text{H}_3\text{NH}^+$      |
| Acetaldehyde  | $\text{C}_2\text{H}_4\text{OH}^+$      |
| Ethanol       | $\text{C}_2\text{H}_6\text{OH}^+$      |
| Acetone       | $\text{C}_3\text{H}_6\text{OH}^+$      |
| Isoprene      | $\text{C}_5\text{H}_8\text{H}^+$       |
| MVK&MACR*     | $\text{C}_4\text{H}_6\text{OH}^+$      |
| MEK           | $\text{C}_4\text{H}_8\text{OH}^+$      |
| Benzene       | $\text{C}_6\text{H}_6\text{H}^+$       |
| Toluene       | $\text{C}_7\text{H}_8\text{H}^+$       |
| Styrene       | $\text{C}_8\text{H}_8\text{H}^+$       |
| C8 aromatics  | $\text{C}_8\text{H}_{10}\text{H}^+$    |
| C9 aromatics  | $\text{C}_9\text{H}_{12}\text{H}^+$    |
| C10 aromatics | $\text{C}_{10}\text{H}_{14}\text{H}^+$ |
| Monoterpenes  | $\text{C}_{10}\text{H}_{16}\text{H}^+$ |

14

15 \* Methyl vinyl ketone (MVK) and methacrolein (MACR) were measured as their sum  
 16 by PTR-ToF-MS

17

18 **Table S2.** The heights of the planetary boundary layer (HPBL) of Beijing determined  
19 by the air parcel method during all the aerial surveys in Sep. 2017 and Jul. 2019.

| Date and time             | Aerial survey stage | HPBL (m) |
|---------------------------|---------------------|----------|
| 2017/09/09<br>12:06-16:54 | Ascending stage     | 1100     |
|                           | Descending stage    | 1200     |
| 2017/09/12<br>12:16-16:10 | Ascending stage     | 900      |
|                           | Descending stage    | 1600     |
| 2017/09/13<br>13:35-16:55 | Ascending stage     | 1000     |
|                           | Descending stage    | 1400     |
| 2017/09/14<br>12:31-16:58 | Ascending stage     | 850      |
|                           | Descending stage    | 1300     |
| 2017/09/15<br>10:36-13:05 | Ascending stage     | 450      |
|                           | Descending stage    | 750      |
| 2019/07/14<br>9:41-12:18  | Ascending stage     | 750      |
|                           | Descending stage    | 1700     |

21 **Table S3.** The means and standard deviations of VOC concentrations during all aerial surveys in Sep. 2017 in ppb.

| Species       | Sep. 9, 2017 | Sep. 12, 2017 | Sep. 13, 2017 | Sep. 14, 2017 | Sep. 15, 2017 |
|---------------|--------------|---------------|---------------|---------------|---------------|
| Methanol      | 7.51±6.74    | 4.29±2.35     | 10.86±9.92    | 10.42±9.51    | 9.92±10.17    |
| Acetonitrile  | 0.26±0.14    | 0.30±0.06     | 0.43±0.16     | 0.38 ±0.17    | 0.35±0.13     |
| Acetaldehyde  | 3.11±1.92    | 2.35±1.91     | 3.44±3.11     | 3.34±3.21     | 2.32±2.39     |
| Ethanol       | 10.81±14.23  | 6.29±8.29     | 17.09±21.56   | 23.03±36.10   | 14.47±22.72   |
| Acetone       | 4.01±2.16    | 3.23±1.12     | 5.70±3.98     | 4.99 ±3.15    | 4.23±1.87     |
| Isoprene      | 0.92±0.96    | 1.63±0.93     | 2.22±1.29     | 2.03±1.46     | 4.25±0.51     |
| MVK&MACR*     | 0.60±0.73    | 3.65±1.13     | 3.65±1.65     | 2.64±1.22     | 1.79±0.72     |
| MEK °         | 0.57±0.59    | 0.70±0.18     | 1.08±0.91     | 1.16±0.91     | 0.83±0.74     |
| Benzene       | 0.46±0.38    | 0.20±0.37     | 0.61±0.66     | 0.49±0.52     | 0.43±0.41     |
| Toluene       | 0.37±0.34    | 0.44±0.27     | 0.65±0.64     | 0.8 ±0.91     | 0.60±0.89     |
| Styrene       | 0.28±0.20    | 0.09±0.13     | 0.07±0.08     | 0.08±0.09     | 0.06±0.08     |
| C8 aromatics  | 0.62±0.55    | 0.63±0.37     | 1.20±2.33     | 1.24±1.96     | 1.13±1.95     |
| C9 aromatics  | 0.34±0.19    | 0.55±0.20     | 0.59±0.33     | 0.48±0.42     | 0.41±0.34     |
| C10 aromatics | 0.3±0.22     | 0.34±0.14     | 0.29±0.15     | 0.25±0.15     | 0.22±0.14     |

|              |             |             |             |             |             |
|--------------|-------------|-------------|-------------|-------------|-------------|
| Monoterpenes | 0.19±0.17   | 1.34±0.23   | 0.95±0.24   | 0.71±0.21   | 0.59±0.18   |
| Total VOCs   | 30.38±27.41 | 25.87±13.41 | 48.83±45.32 | 52.10±57.67 | 41.18±41.44 |

22

23 \* Methyl vinyl ketone (MVK) and methacrolein (MACR) were measured as their sum by PTR-ToF-MS.

24

25 **Table S4.** The means and standard deviations of VOC concentrations below the planetary boundary layer (PBL) during all aerial surveys in Sep.  
 26 2017 in ppb.

| Species      | Sep. 9, 2017 | Sep. 12, 2017 | Sep. 13, 2017 | Sep. 14, 2017 | Sep. 15, 2017 | AVG±SD      |
|--------------|--------------|---------------|---------------|---------------|---------------|-------------|
| Methanol     | 17.56±1.77   | 9.43±2.07     | 27.00±3.08    | 21.23±10.50   | 29.65±4.73    | 21.94±8.30  |
| Acetonitrile | 0.43±0.06    | 0.34±0.06     | 0.68±0.09     | 0.55±0.22     | 0.58±0.10     | 0.53±0.16   |
| Acetaldehyde | 5.28 ±0.66   | 5.26±4.35     | 8.79±1.56     | 6.69±4.42     | 6.91±1.34     | 6.66±2.86   |
| Ethanol      | 32.82±7.98   | 22.84±7.76    | 54.34±8.33    | 62.52±51.91   | 59.07±14.46   | 46.74±26.38 |
| Acetone      | 7.51±0.51    | 3.85±1.19     | 11.47±0.62    | 8.39±3.44     | 7.52±1.02     | 8.10±2.72   |
| Isoprene     | 2.63 ±0.99   | 2.99±1.69     | 4.19±0.93     | 3.69±1.77     | 4.49±0.74     | 3.60±1.40   |
| MVK&MACR*    | 1.94±0.48    | 6.03±2.11     | 6.59±1.22     | 4.03±1.28     | 3.07±0.67     | 4.10±2.18   |
| MEK          | 1.58±0.36    | 1.11±0.22     | 2.63±0.41     | 2.21±0.99     | 2.29±0.34     | 2.02±0.72   |
| Benzene      | 1.08±0.28    | 0.56±1.30     | 1.74±0.65     | 1.07±0.65     | 1.20±0.27     | 1.19±0.73   |
| Toluene      | 0.93±0.17    | 0.94±0.63     | 1.81±0.28     | 1.88±1.13     | 2.37±0.47     | 1.59±0.80   |
| Styrene      | 0.17±0.07    | 0.26±0.44     | 0.19±0.12     | 0.17±0.11     | 0.16±0.12     | 0.18±0.19   |
| C8 aromatics | 1.66±0.59    | 1.51±0.47     | 4.39±4.43     | 3.20±3.04     | 4.71±1.97     | 3.18±2.95   |
| C9 aromatics | 0.64±0.15    | 0.88±0.52     | 1.16±0.36     | 0.88±0.64     | 1.03±0.32     | 0.91±0.44   |

|               |           |           |           |           |           |           |
|---------------|-----------|-----------|-----------|-----------|-----------|-----------|
| C10 aromatics | 0.65±0.21 | 0.56±0.38 | 0.49±0.26 | 0.38±0.22 | 0.40±0.20 | 0.51±0.27 |
| Monoterpenes  | 0.42±0.19 | 1.46±0.38 | 1.18±0.29 | 0.84±0.24 | 0.61±0.22 | 0.84±0.45 |

- 27
- 28 \* Methyl vinyl ketone (MVK) and methacrolein (MACR) were measured as their sum by PTR-ToF-MS.

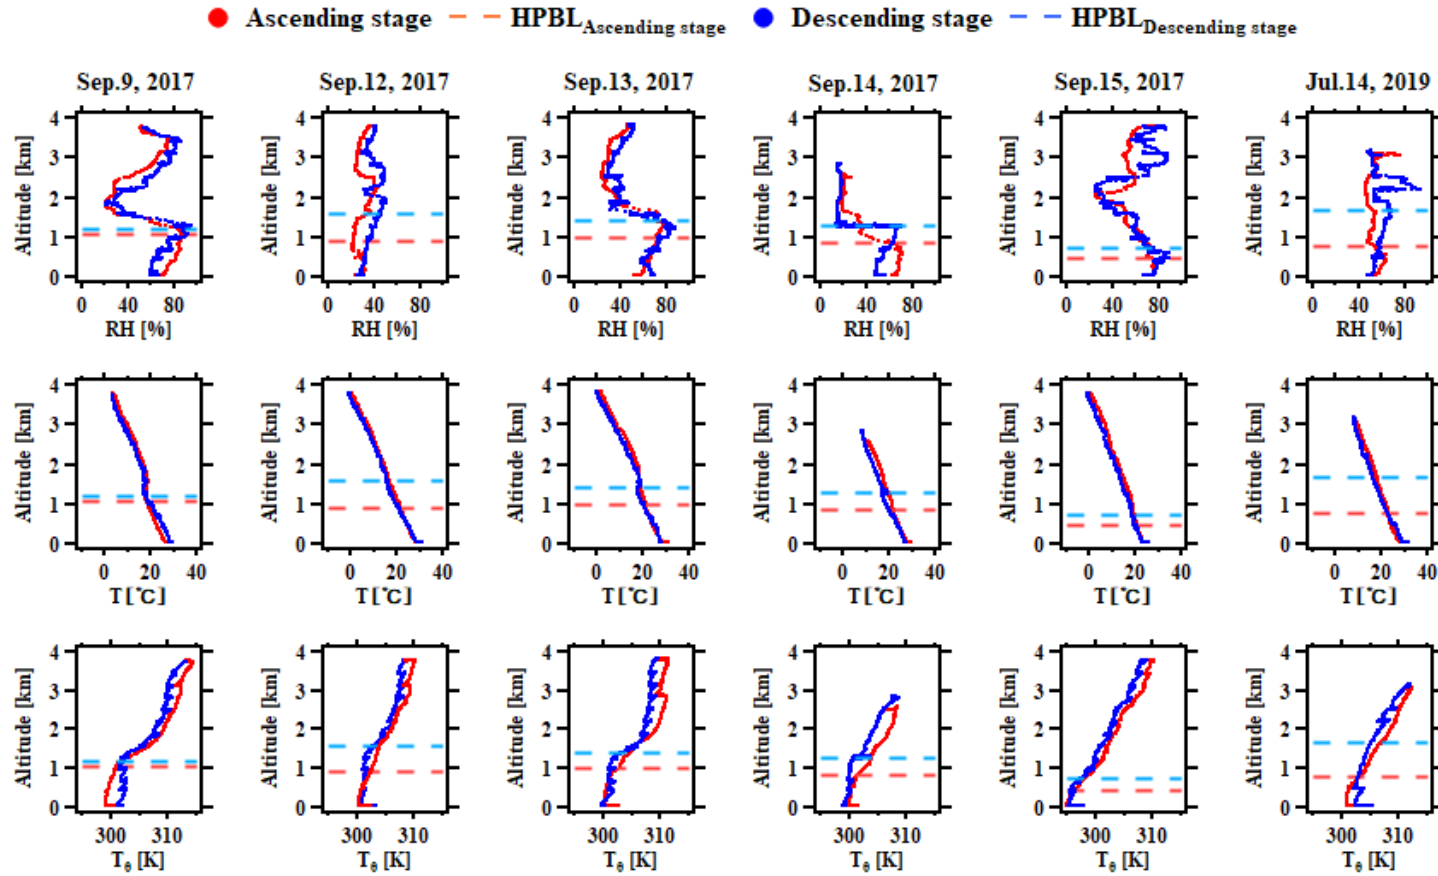

**Figure S1.** Vertical profiles of meteorological factors during Sep. 2017 and Jul. 2019 aerial surveys. The red and blue dots are the data measured during the ascending and descending stages, respectively. The red and blue dashed lines show the HPBL during the ascending and descending stages, respectively.

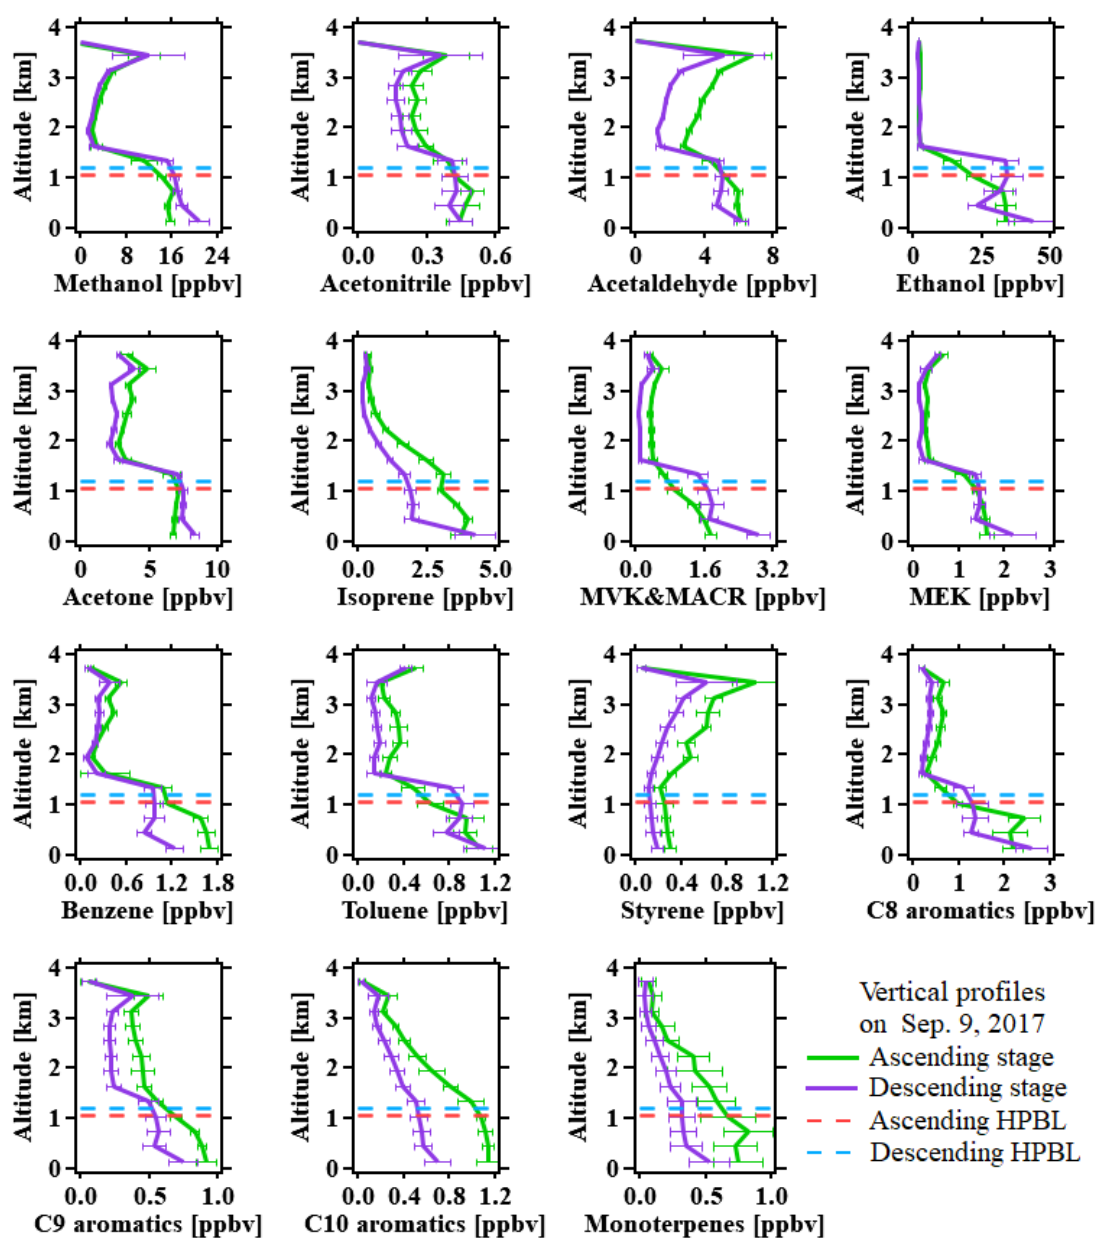

**Figure S2.** Vertical profiles of VOC mixing ratios during the ascending (in green) and descending stages (in purple) for the aerial survey on Sep.9<sup>th</sup>, 2017, with error bars. The red and blue dashed lines show the HPBL during the ascending and descending stages, respectively.

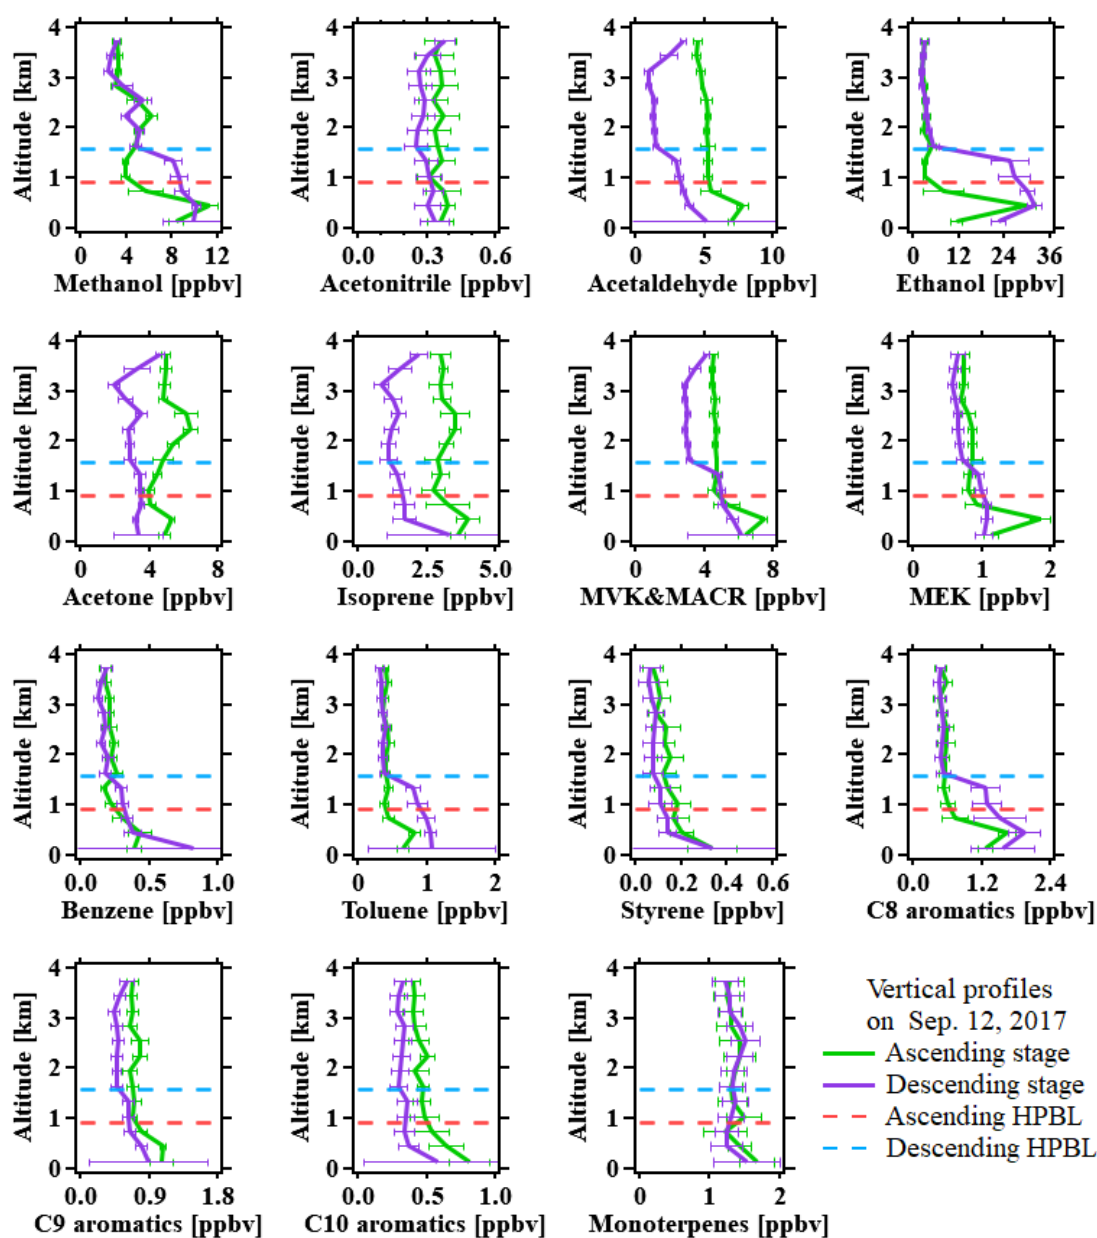

**Figure S3.** Vertical profiles of VOC mixing ratios during the ascending (in green) and descending stages (in purple) for the aerial survey on Sep.12<sup>th</sup>, 2017, with error bars. The red and blue dashed lines show the HPBL during the ascending and descending stages, respectively.

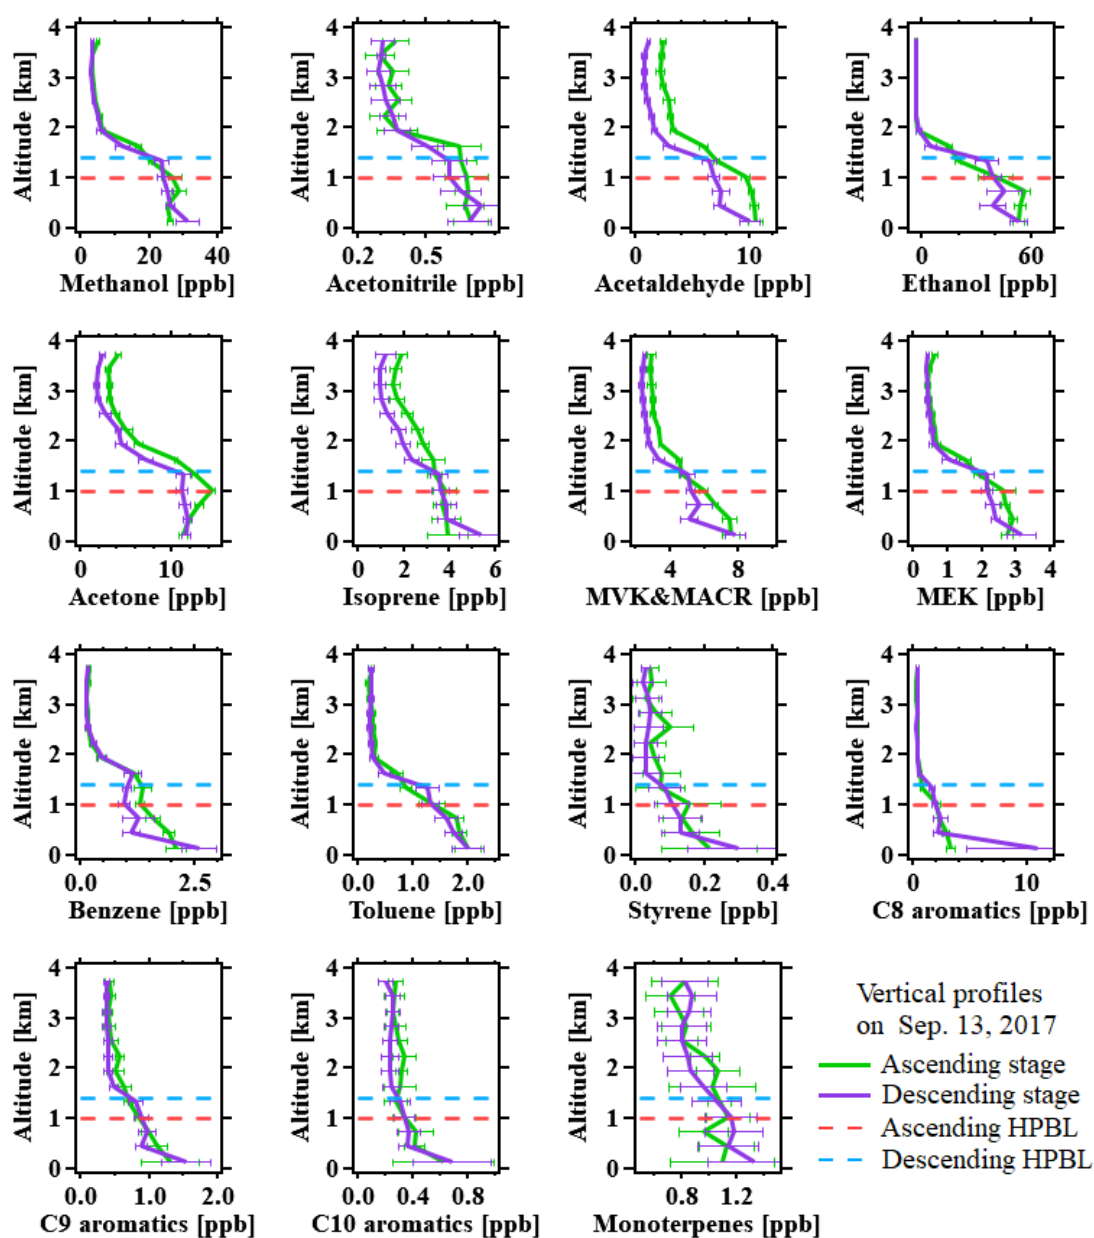

**Figure S4.** Vertical profiles of VOC mixing ratios during the ascending (in green) and descending stages (in purple) for the aerial survey on Sep.13<sup>th</sup>, 2017, with error bars. The red and blue dashed lines show the HPBL during the ascending and descending stages, respectively.

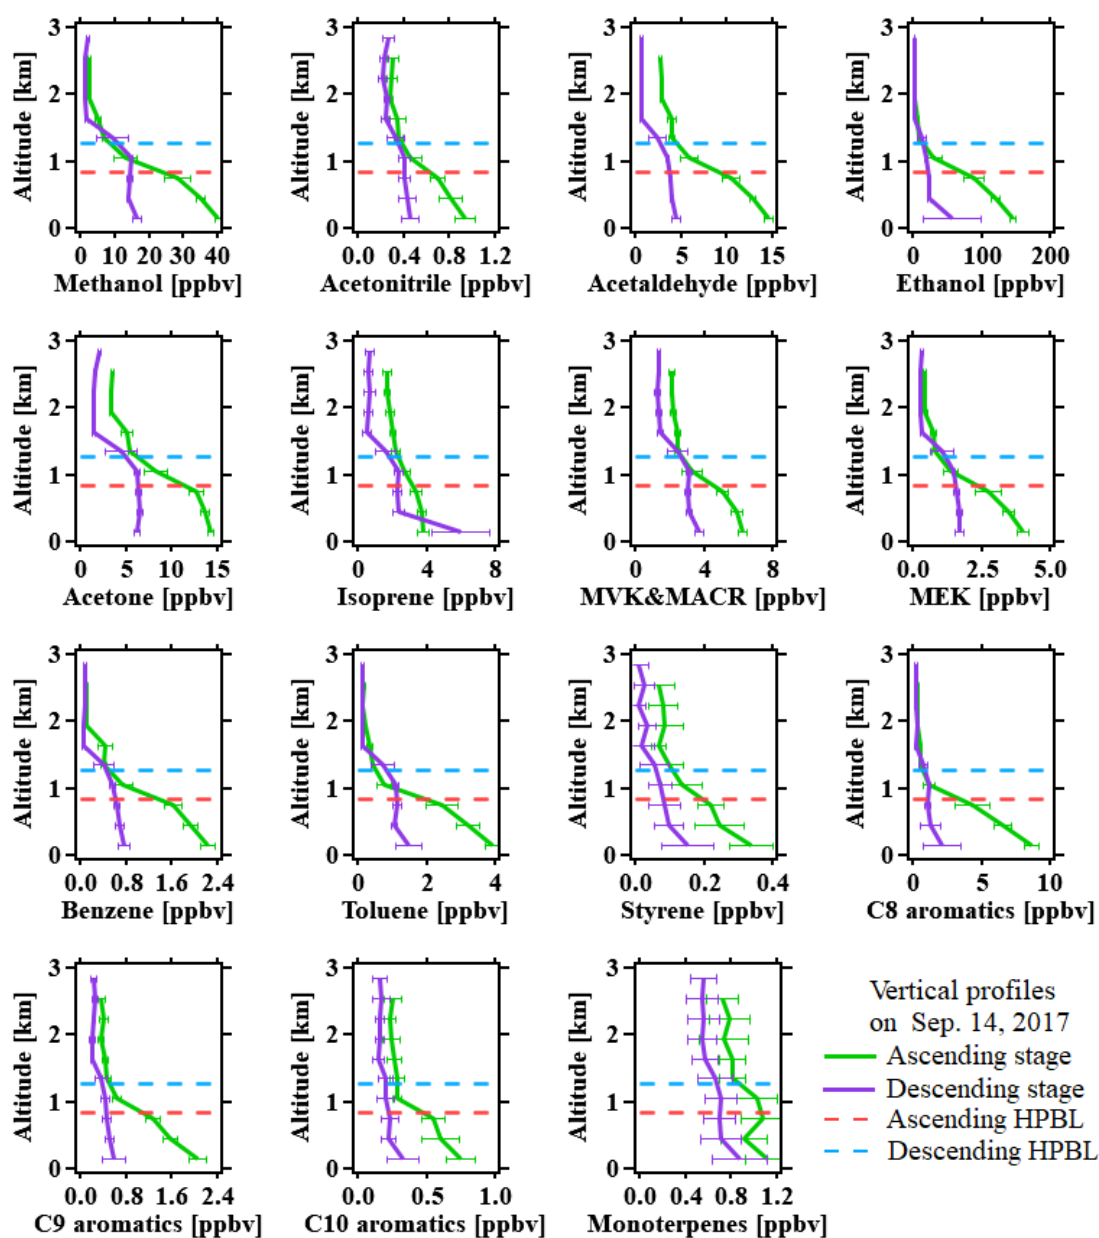

**Figure S5.** Vertical profiles of VOC mixing ratios during the ascending (in green) and descending stages (in purple) for the aerial survey on Sep.14<sup>th</sup>, 2017, with error bars. The red and blue dashed lines show the HPBL during the ascending and descending stages, respectively.

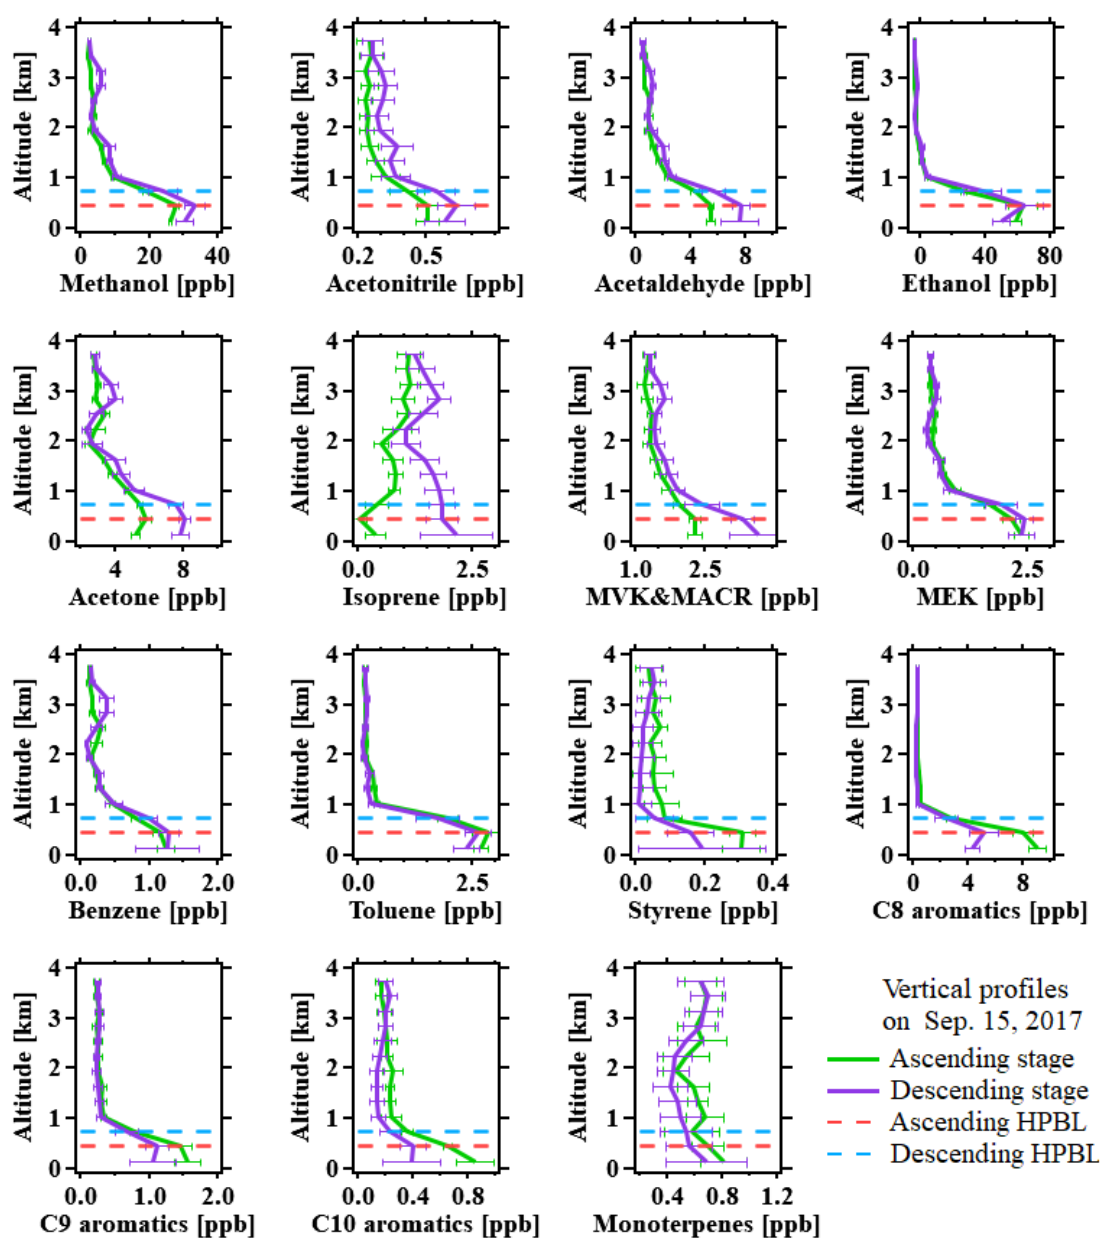

**Figure S6.** Vertical profiles of VOC mixing ratios during the ascending (in green) and descending stages (in purple) for the aerial survey on Sep.15<sup>th</sup>, 2017, with error bars. The red and blue dashed lines show the HPBL during the ascending and descending stages, respectively.

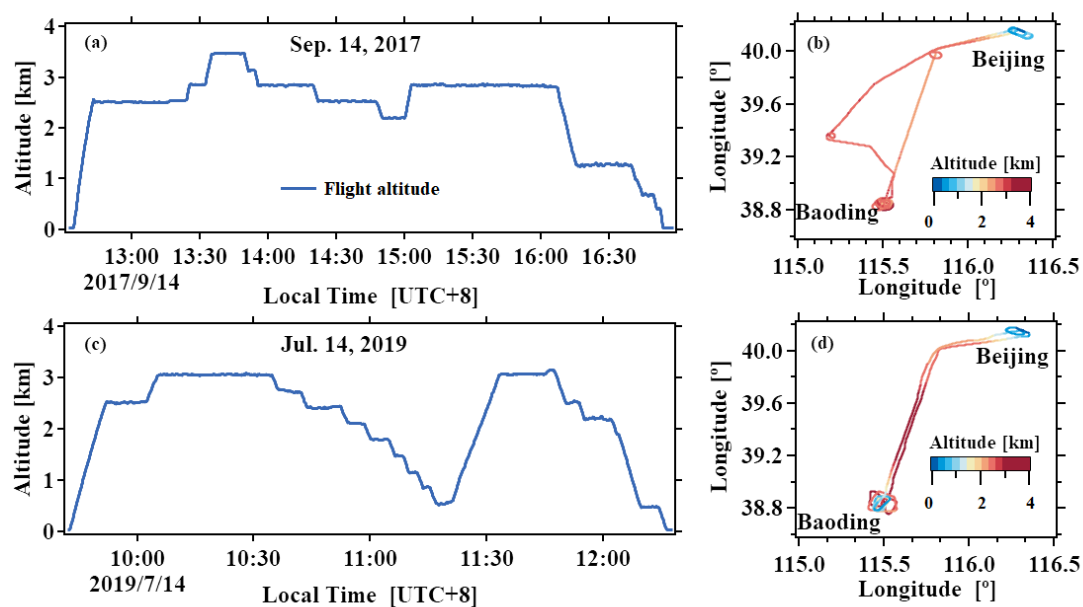

**Figure S7.** Time series of flight altitudes and flight routes on Sep.14<sup>th</sup>, 2017 (a, b) and Jul. 14<sup>th</sup>, 2019 (c, d). The flight routes are color-coded with altitudes.

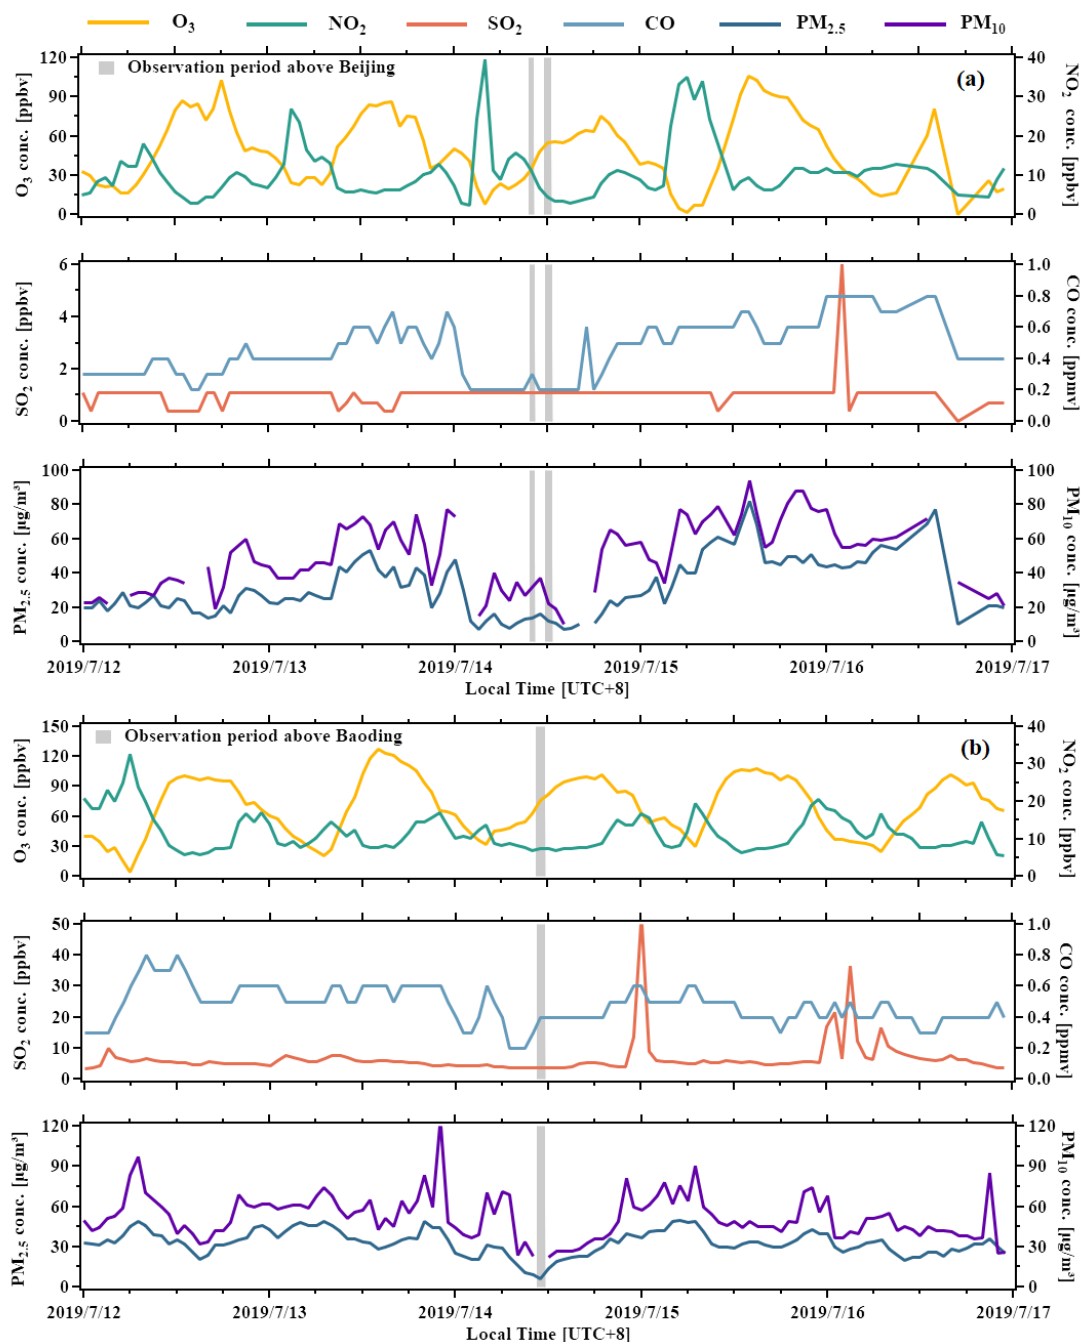

**Figure S8.** Time series of criteria pollutants including ozone, NO<sub>2</sub>, SO<sub>2</sub>, CO, PM<sub>2.5</sub>, and PM<sub>10</sub> on Sep. 14<sup>th</sup>, 2019, over Beijing (a) and Baoding (b). Data is obtained from the Beijing Changping Town station and the Baoding natatorium station, the closest national air quality monitoring stations to the flight trajectories. Shaded areas indicate the observation periods.
